# Supplementary material for: Shortcut citations in the methods section: Frequency, problems, and strategies for responsible reuse
Source: PubMed Central journal article supplement (PMC10986953; doi:10.1371/journal.pbio.3002562), 2024-04-02

# Neuroscience 1st quintile

🔒 Paywall    📄 Paper    📄 Protocol    🌐 Website    📖 Book    ✕ Dead end    ↑ found online    // Before 1970

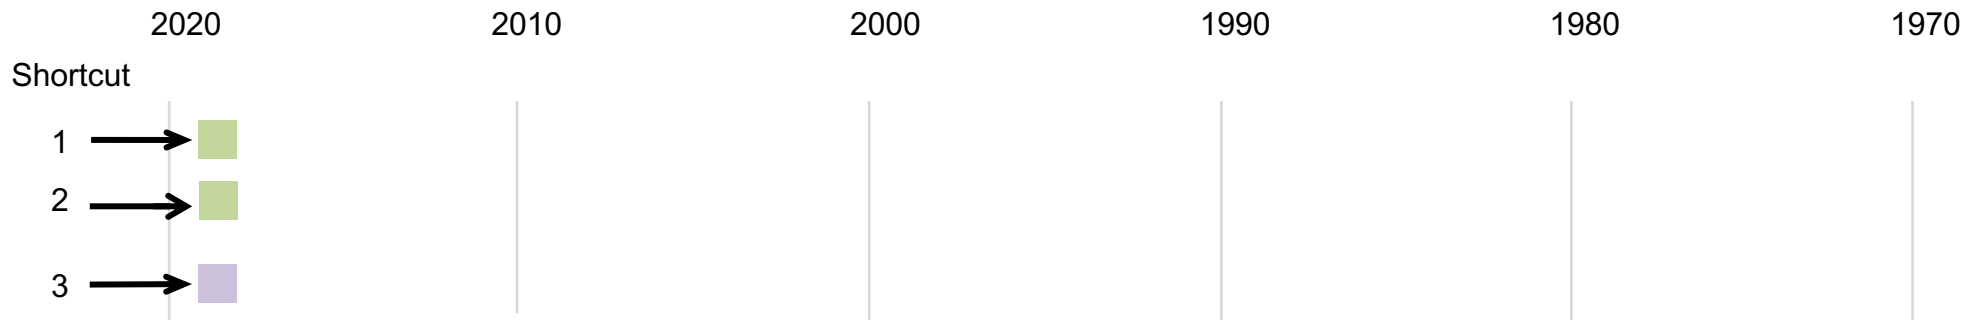

# Neuroscience 2nd quintile

🔒 Paywall    📄 Paper    📄 Protocol    🌐 Website    📖 Book    ✕ Dead end    ↑ found online    // Before 1970

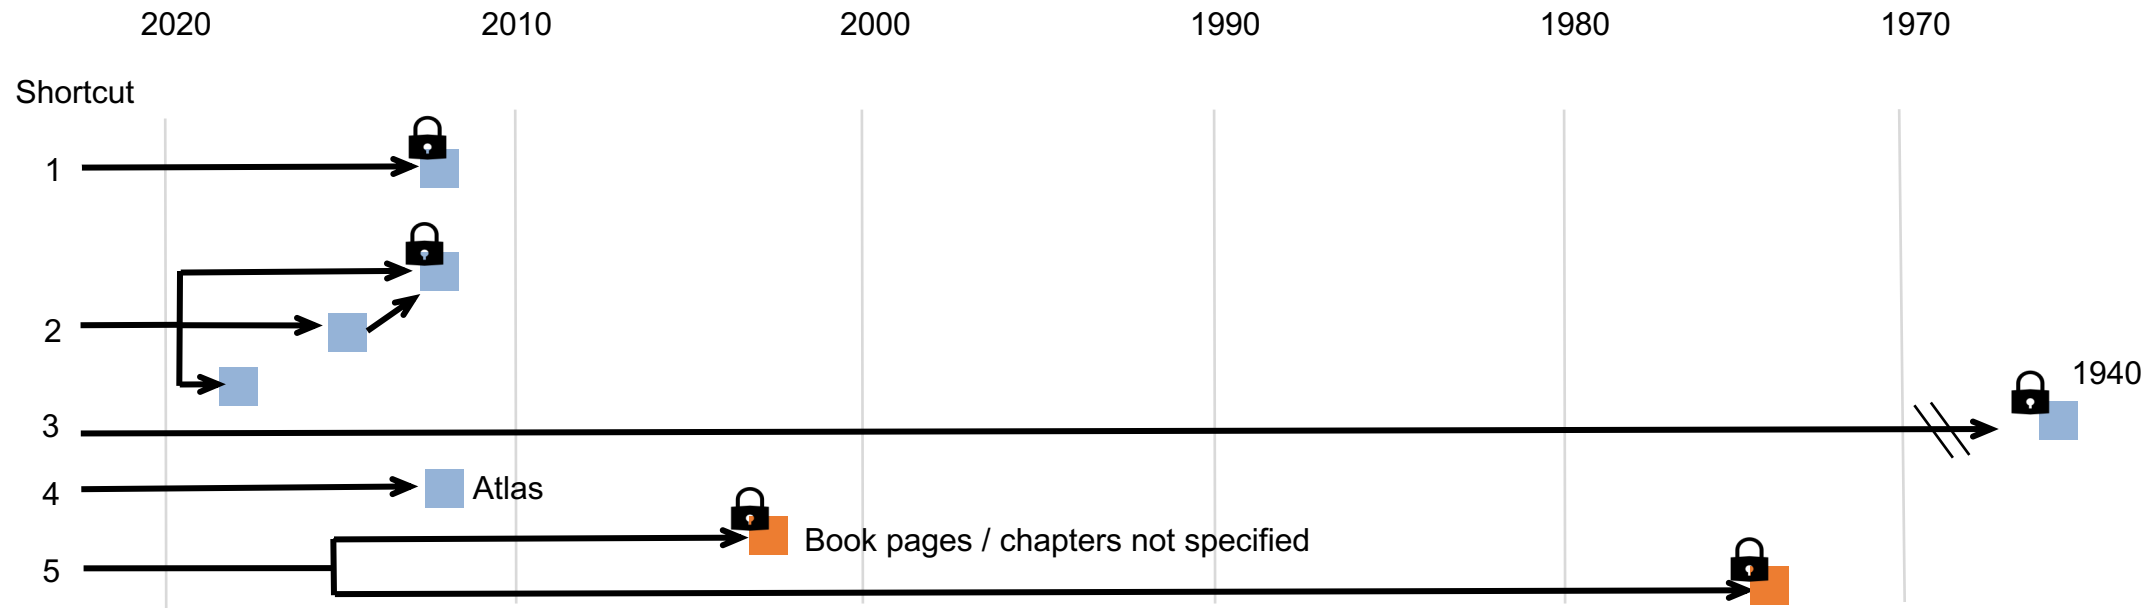

# Neuroscience 3rd quintile

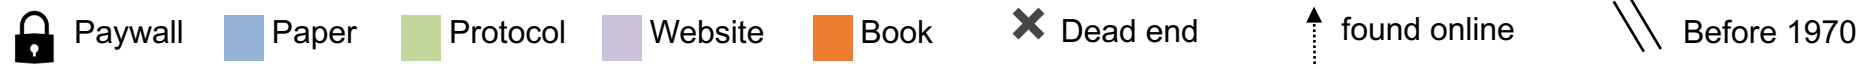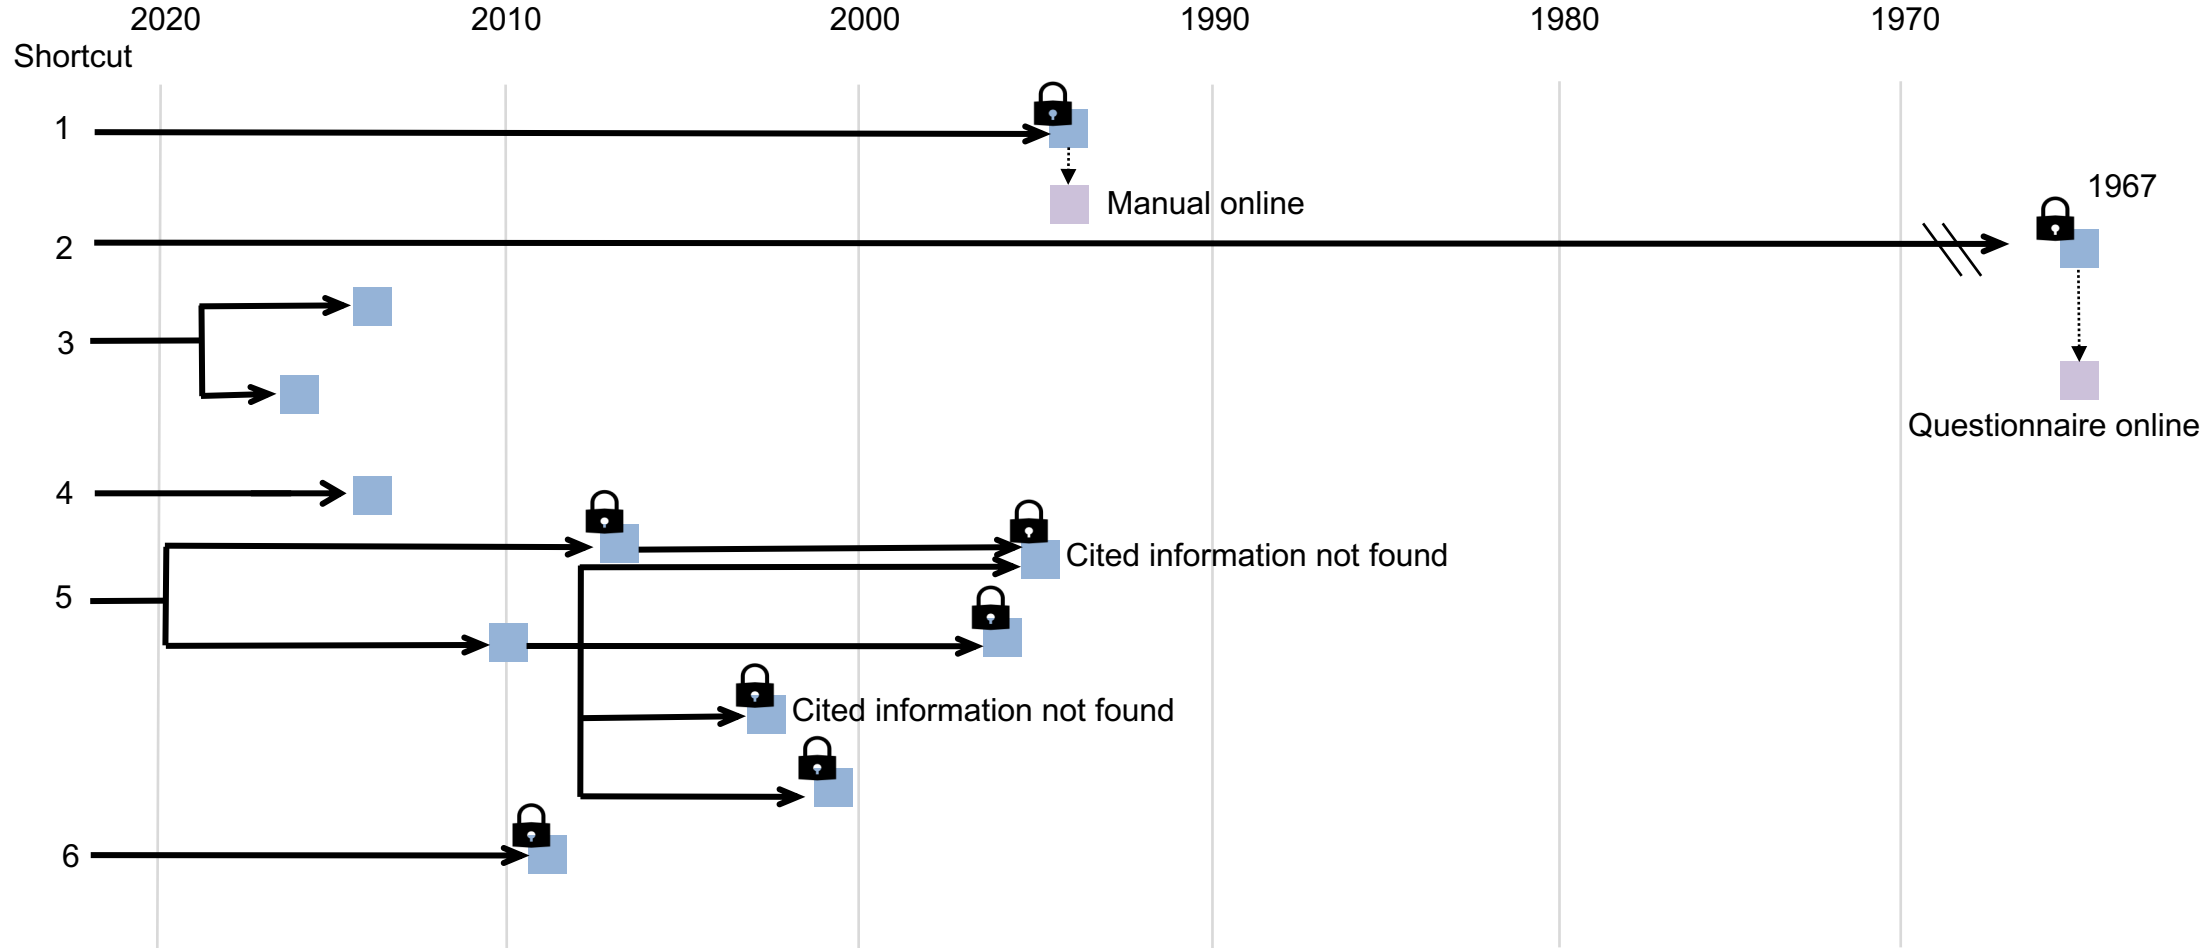

# Neuroscience 4th quintile

🔒 Paywall    📄 Paper    📄 Protocol    🌐 Website    📖 Book    ✕ Dead end    ↑ found online    // Before 1970

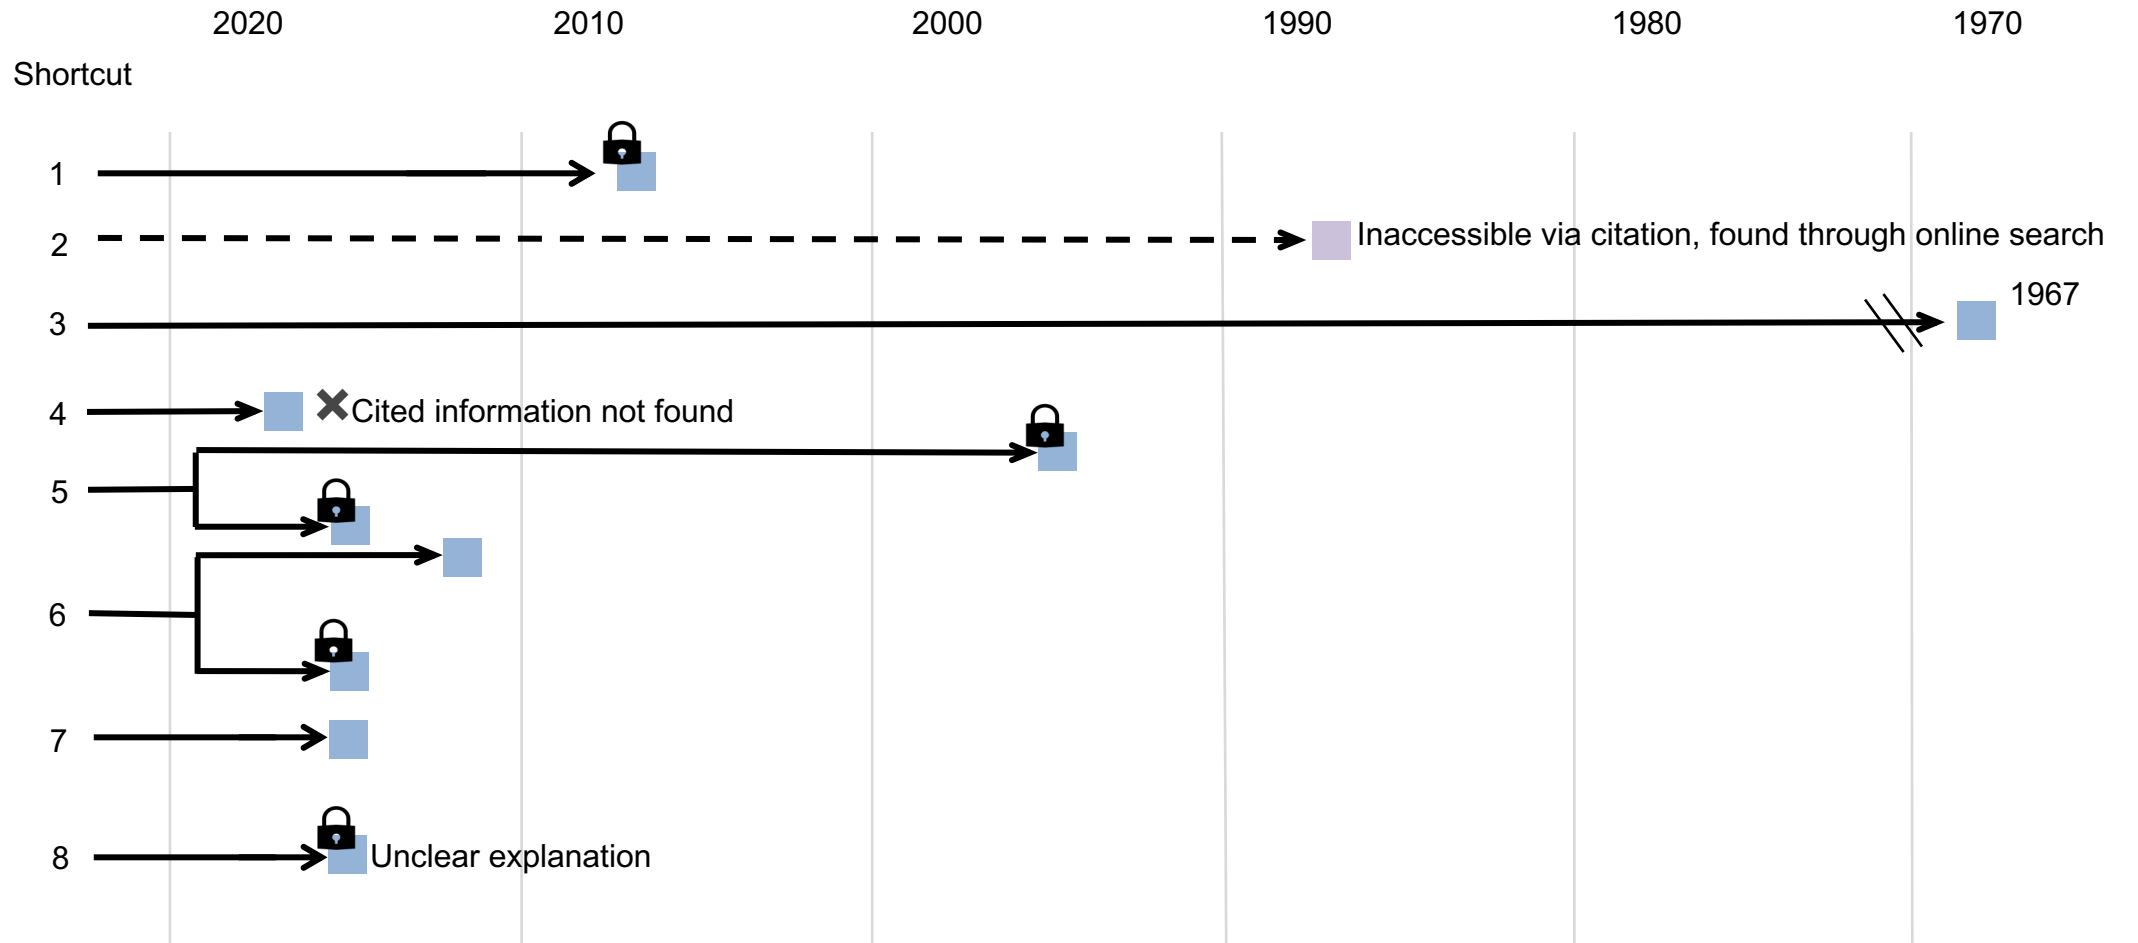

# Neuroscience 5th quintile

Paywall Paper Protocol Website Book Dead end found online Before 1970

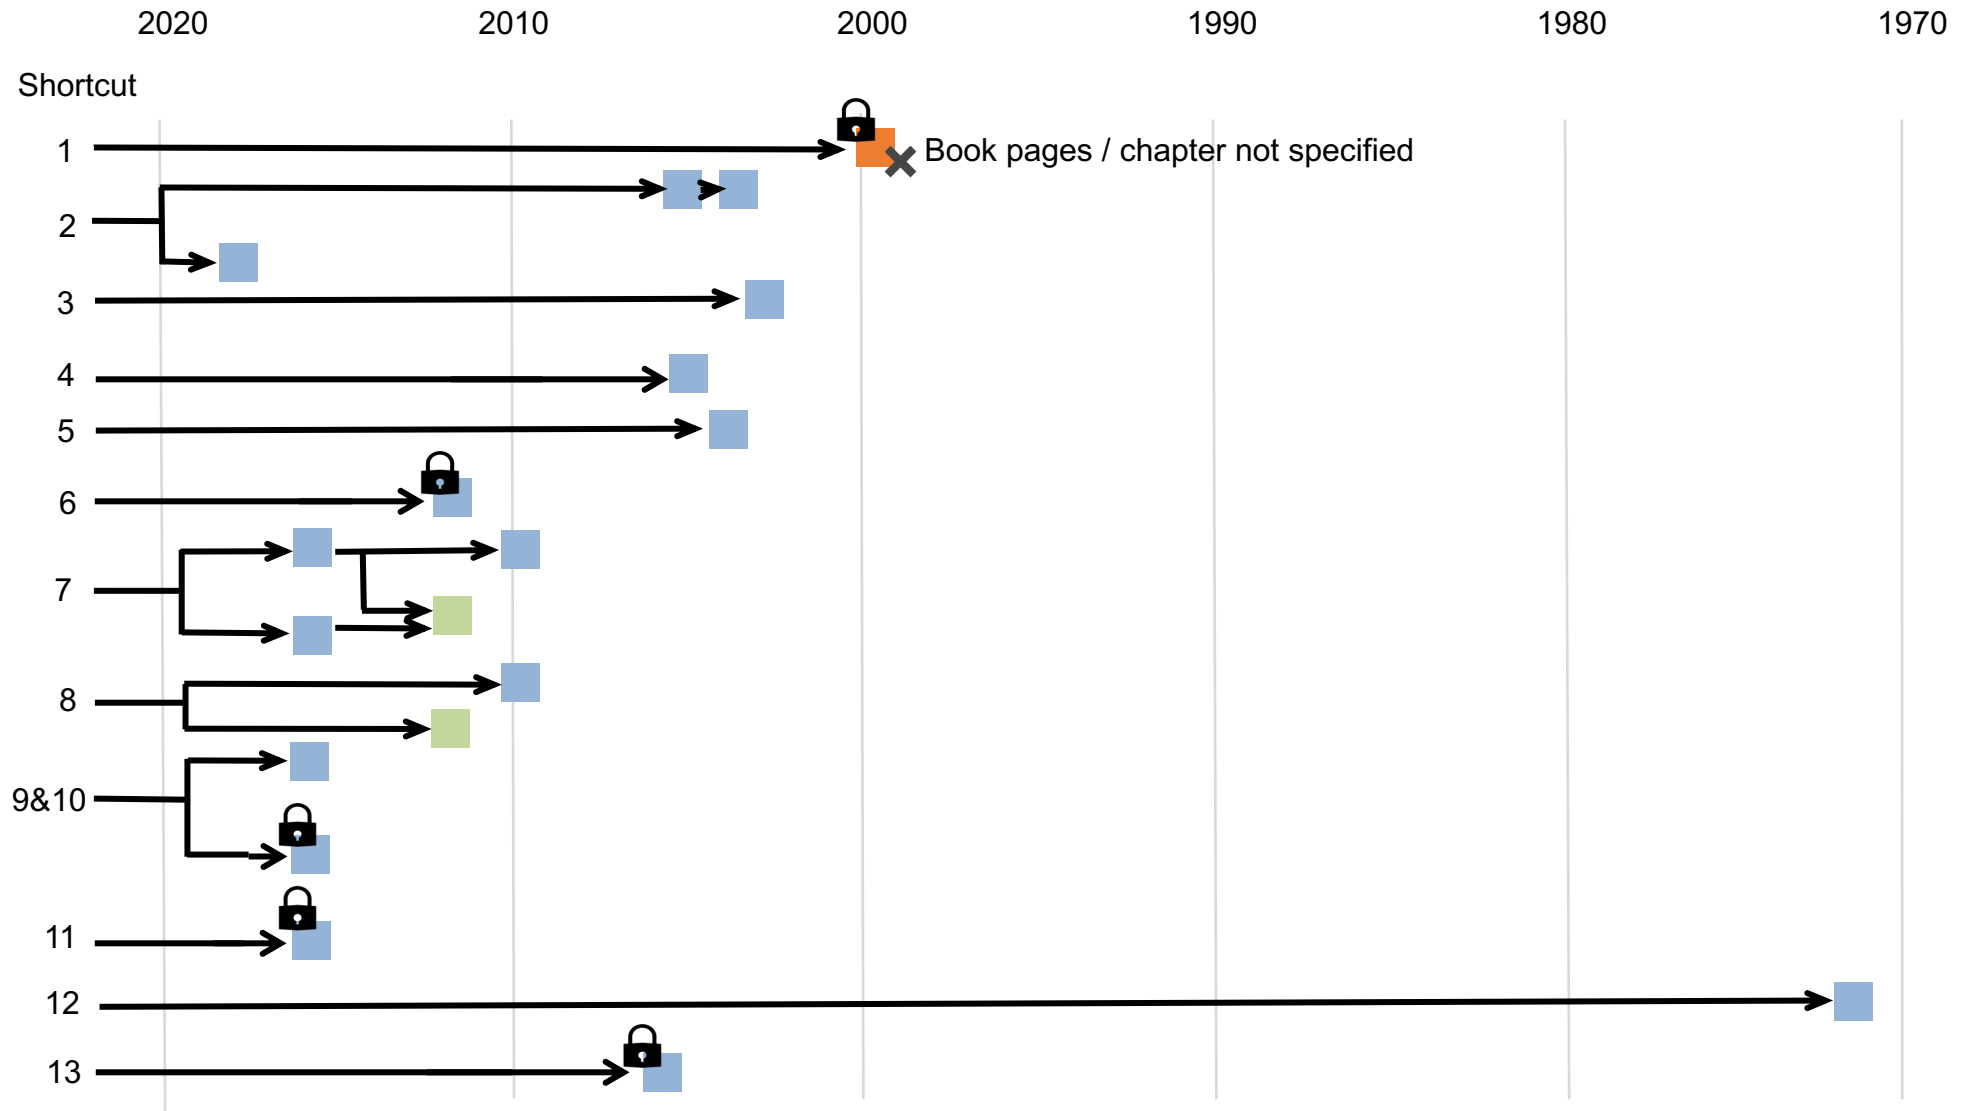

# Biology 1st quintile

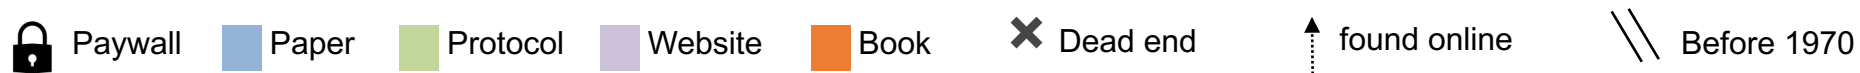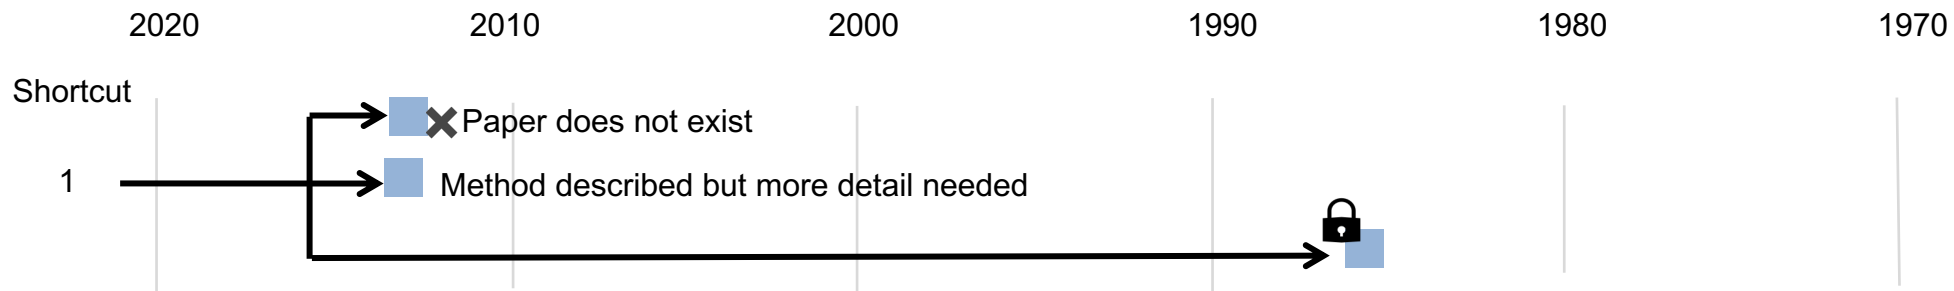

# Biology 2nd quintile

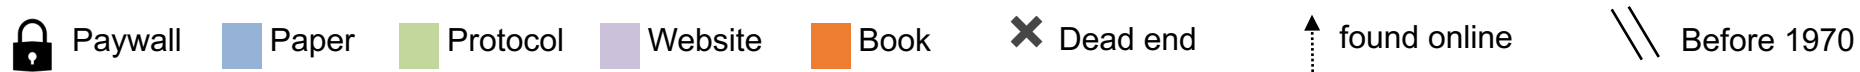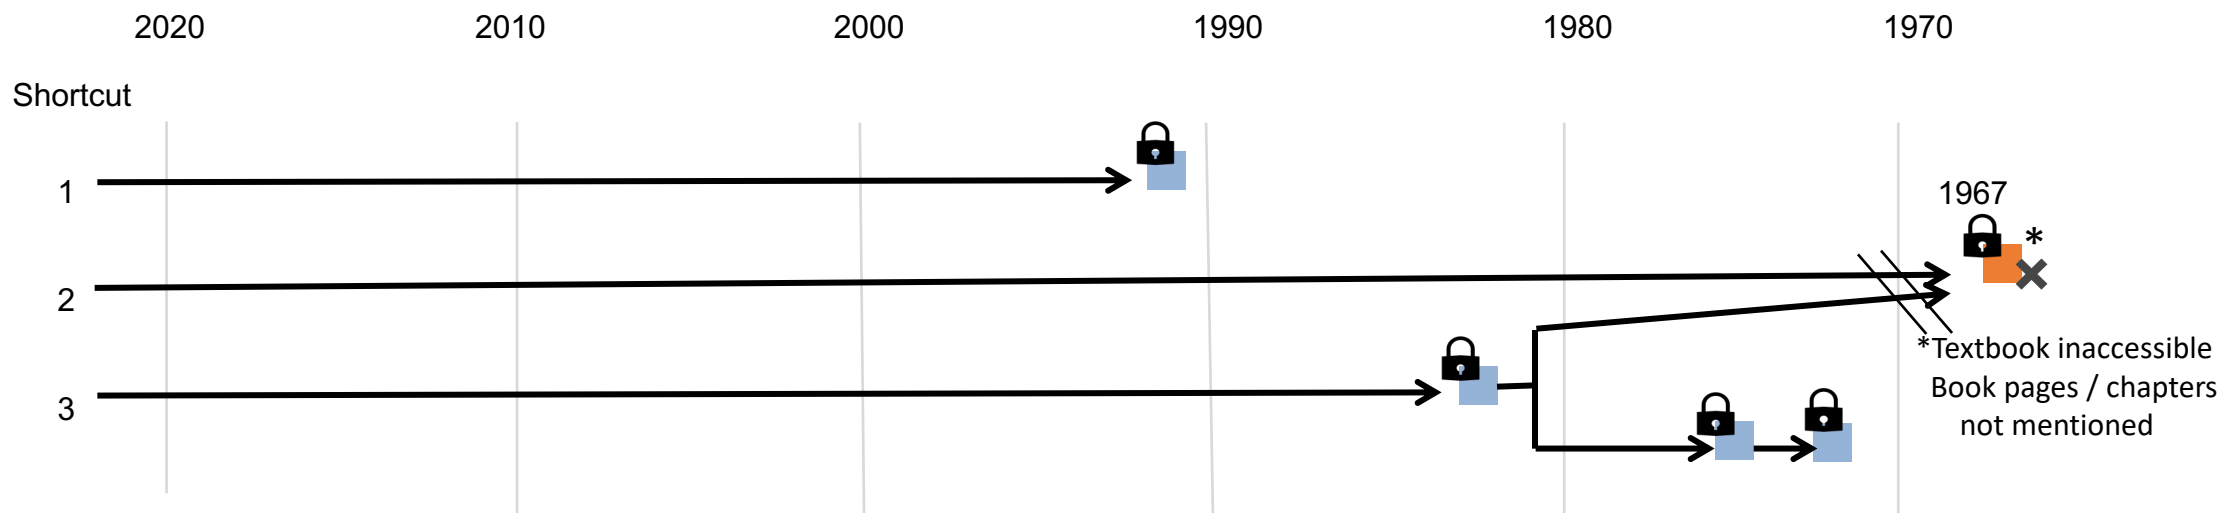

# Biology 3rd quintile

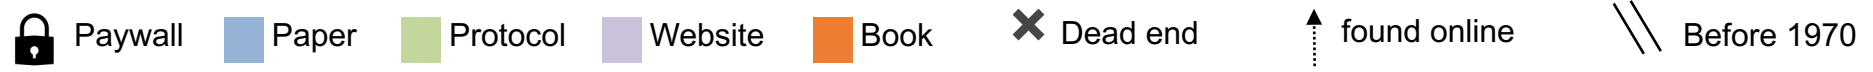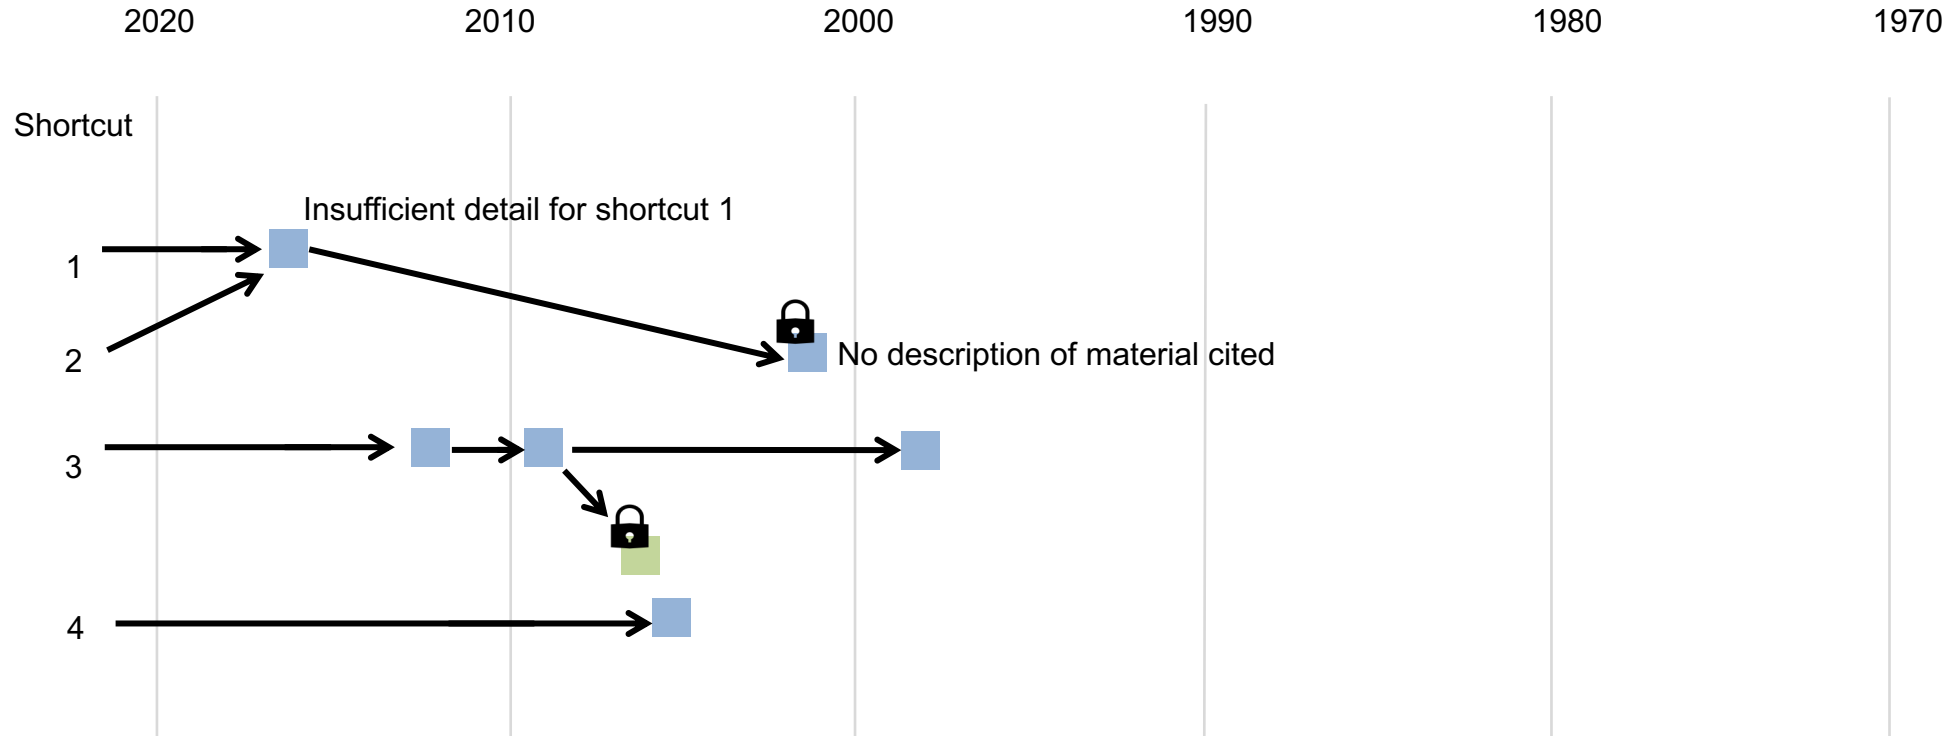

# Biology 4th quintile

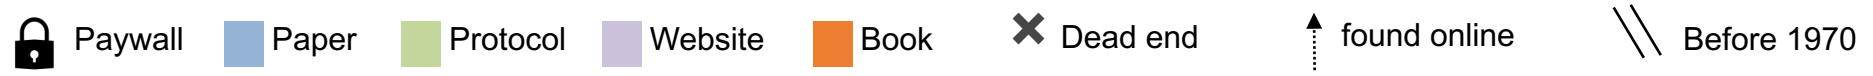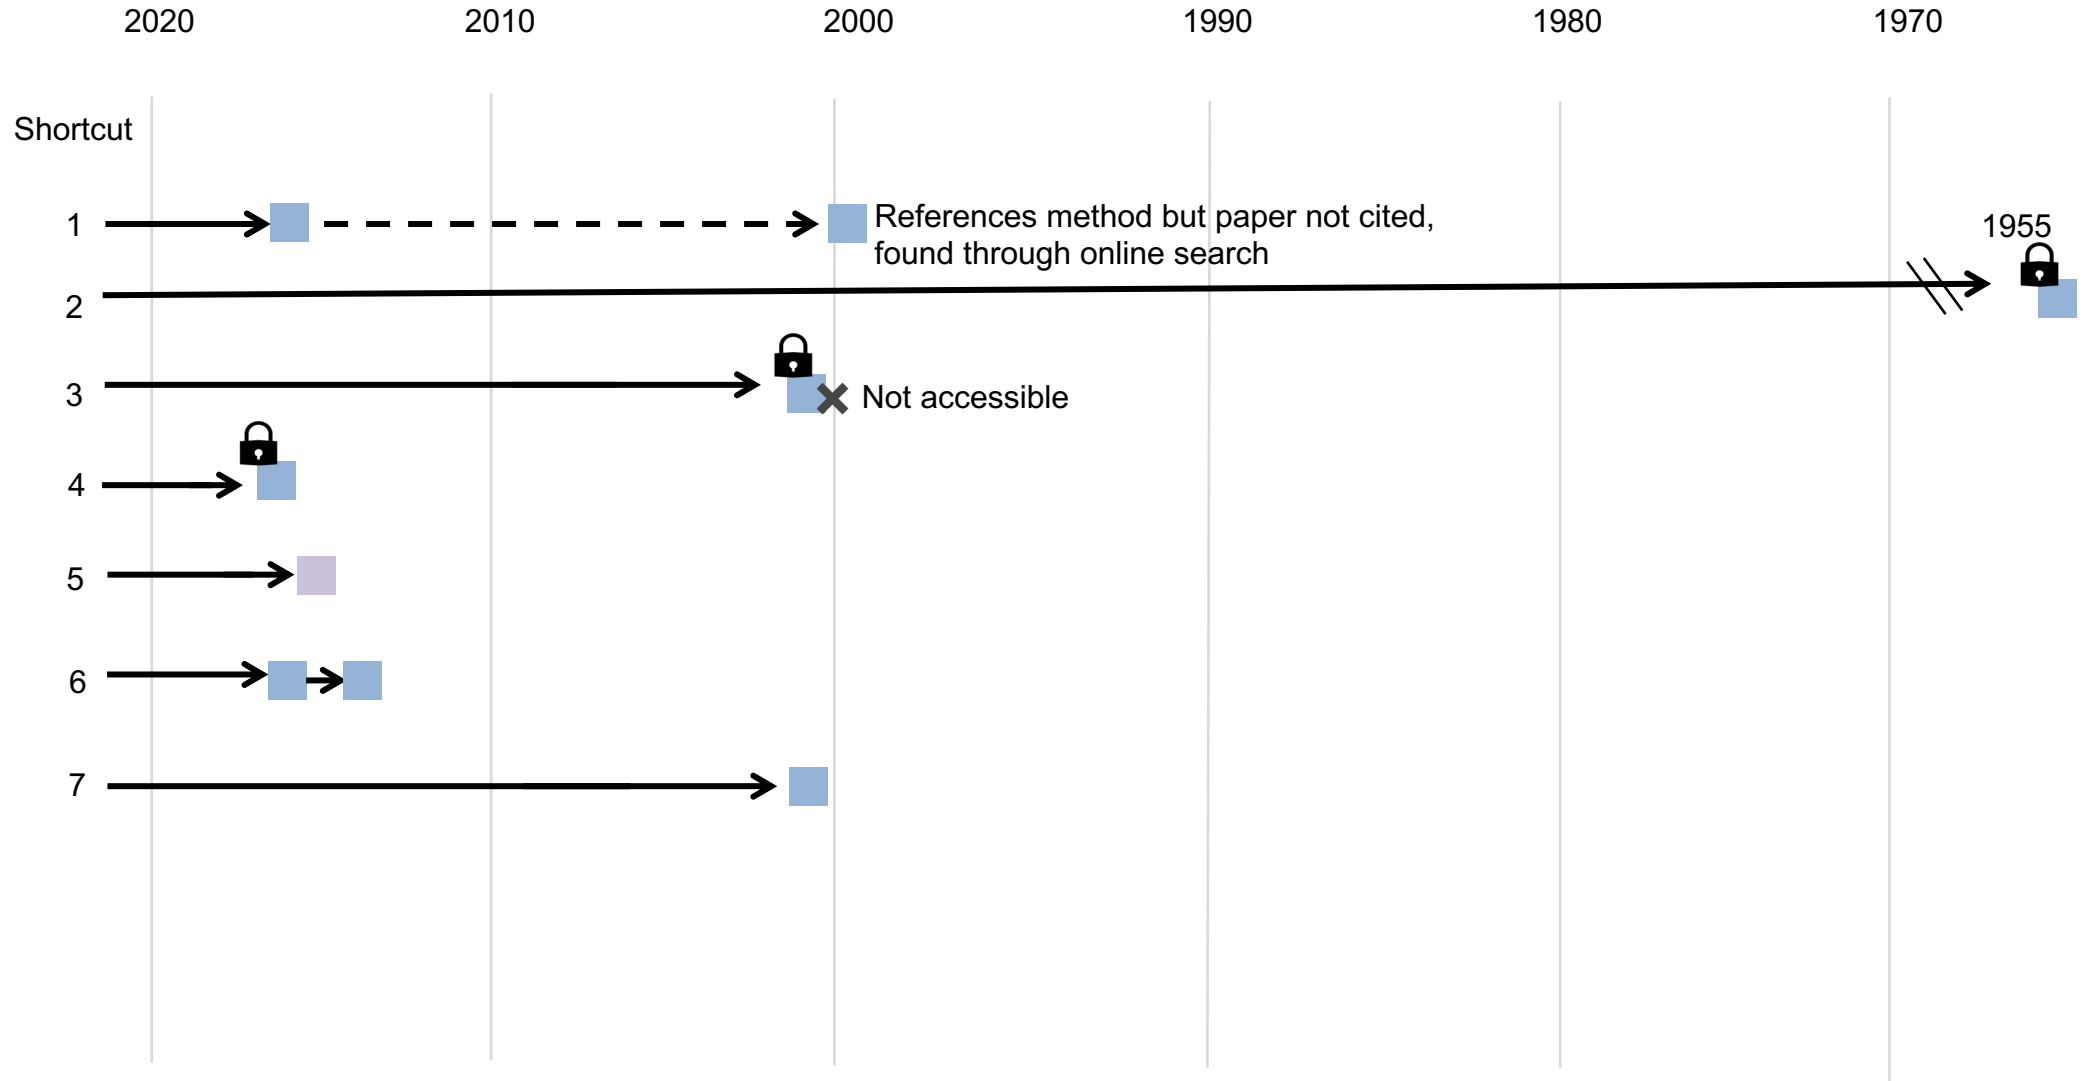

# Biology 5th quintile

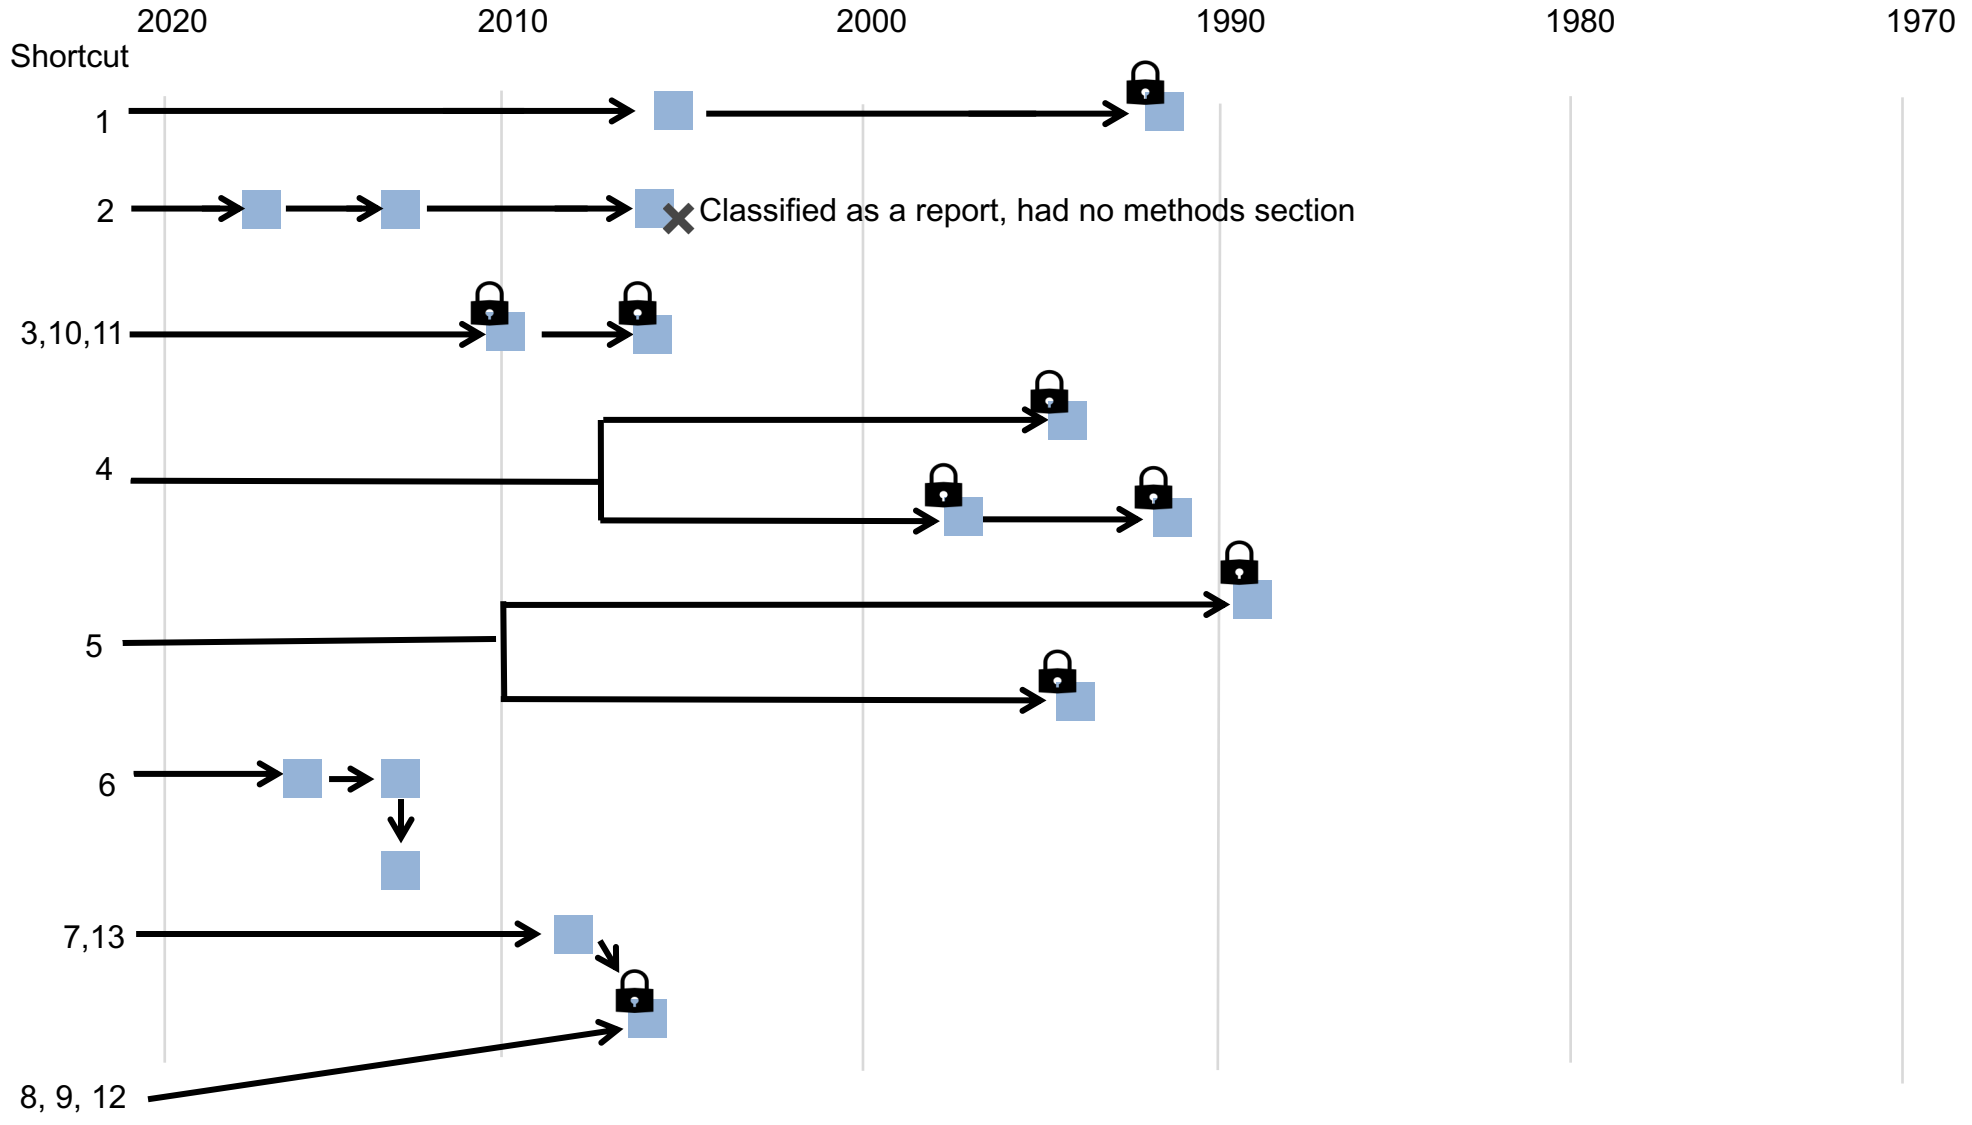



# Psychiatry 1st quintile

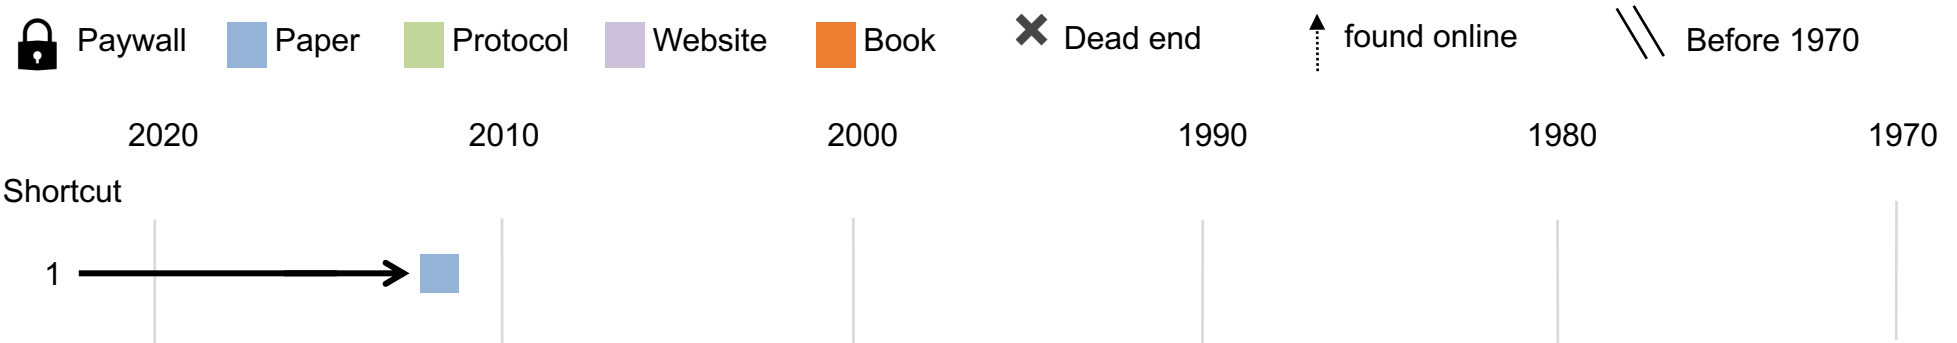

# Psychiatry 2nd quintile

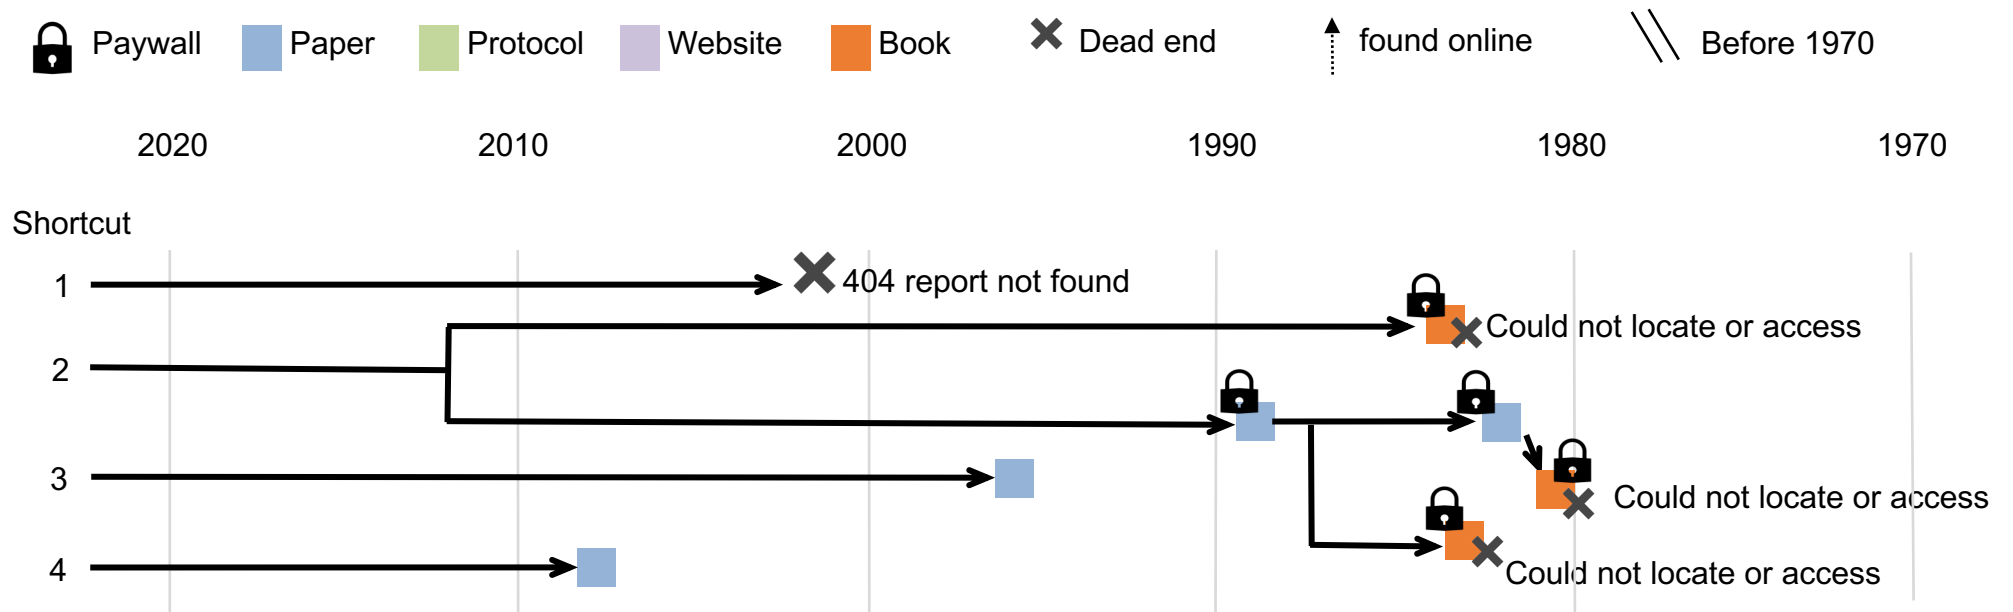

# Psychiatry 3rd quintile

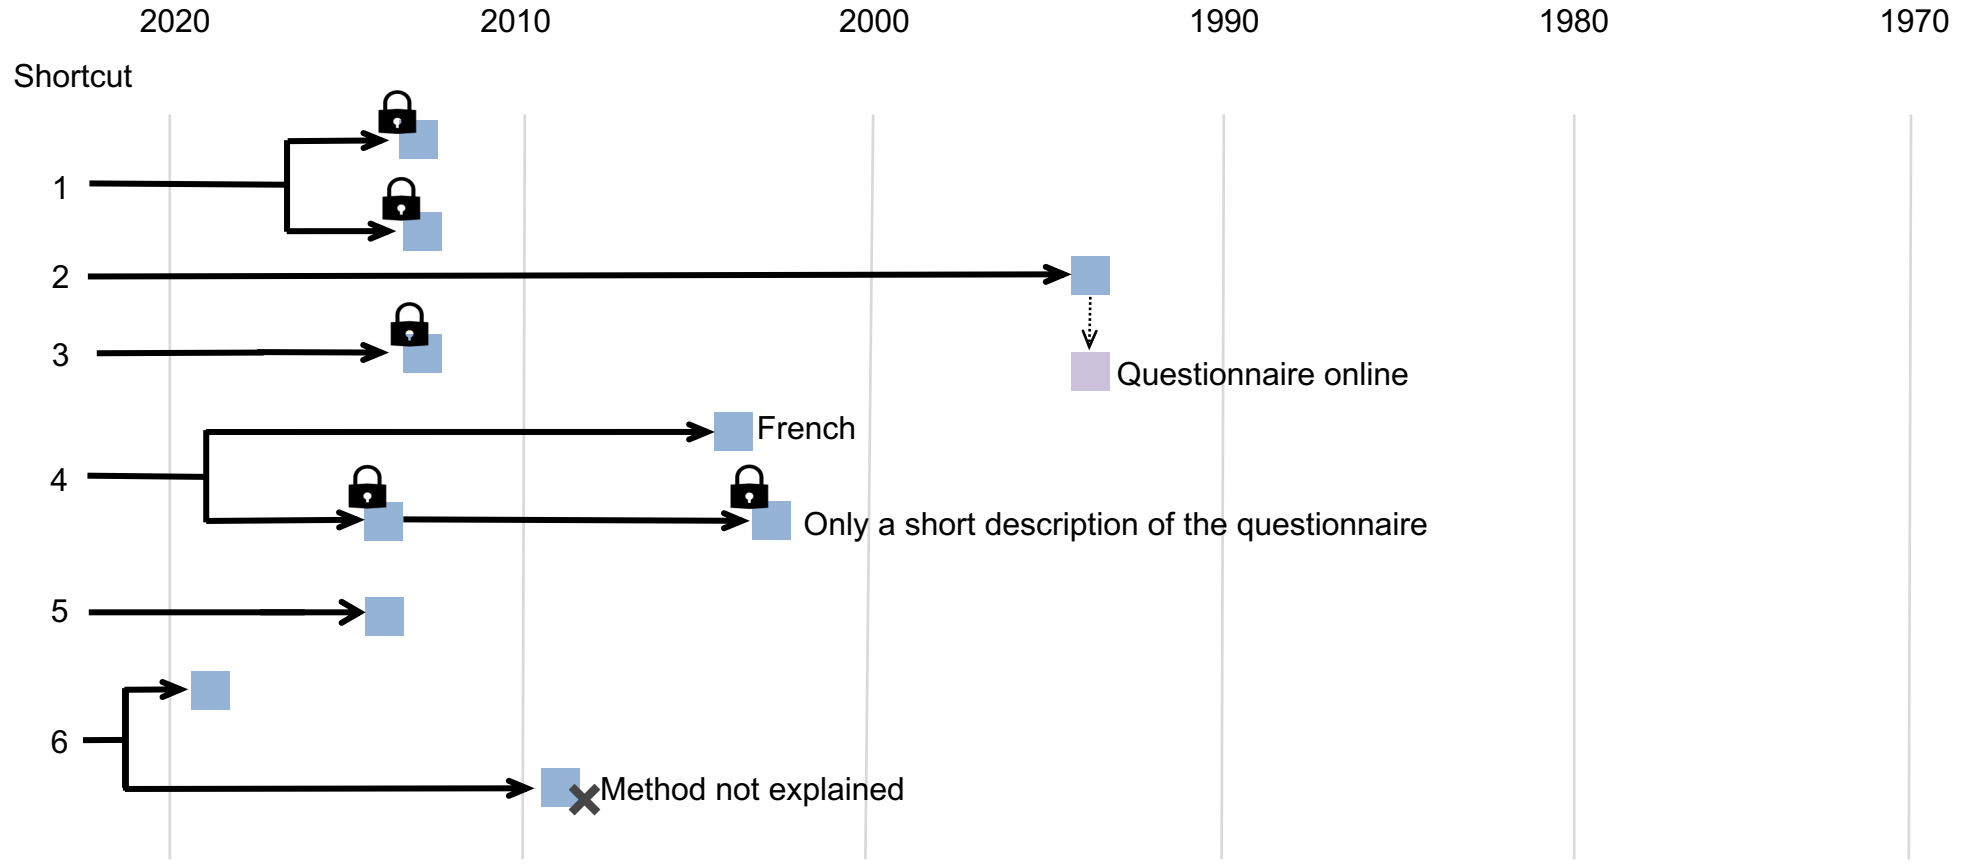

# Psychiatry 4th quintile

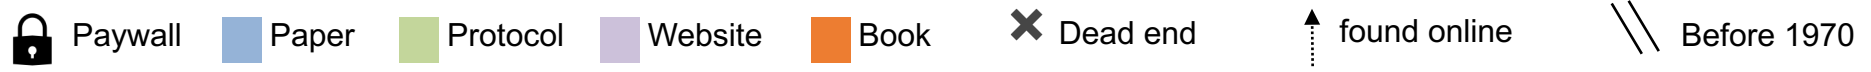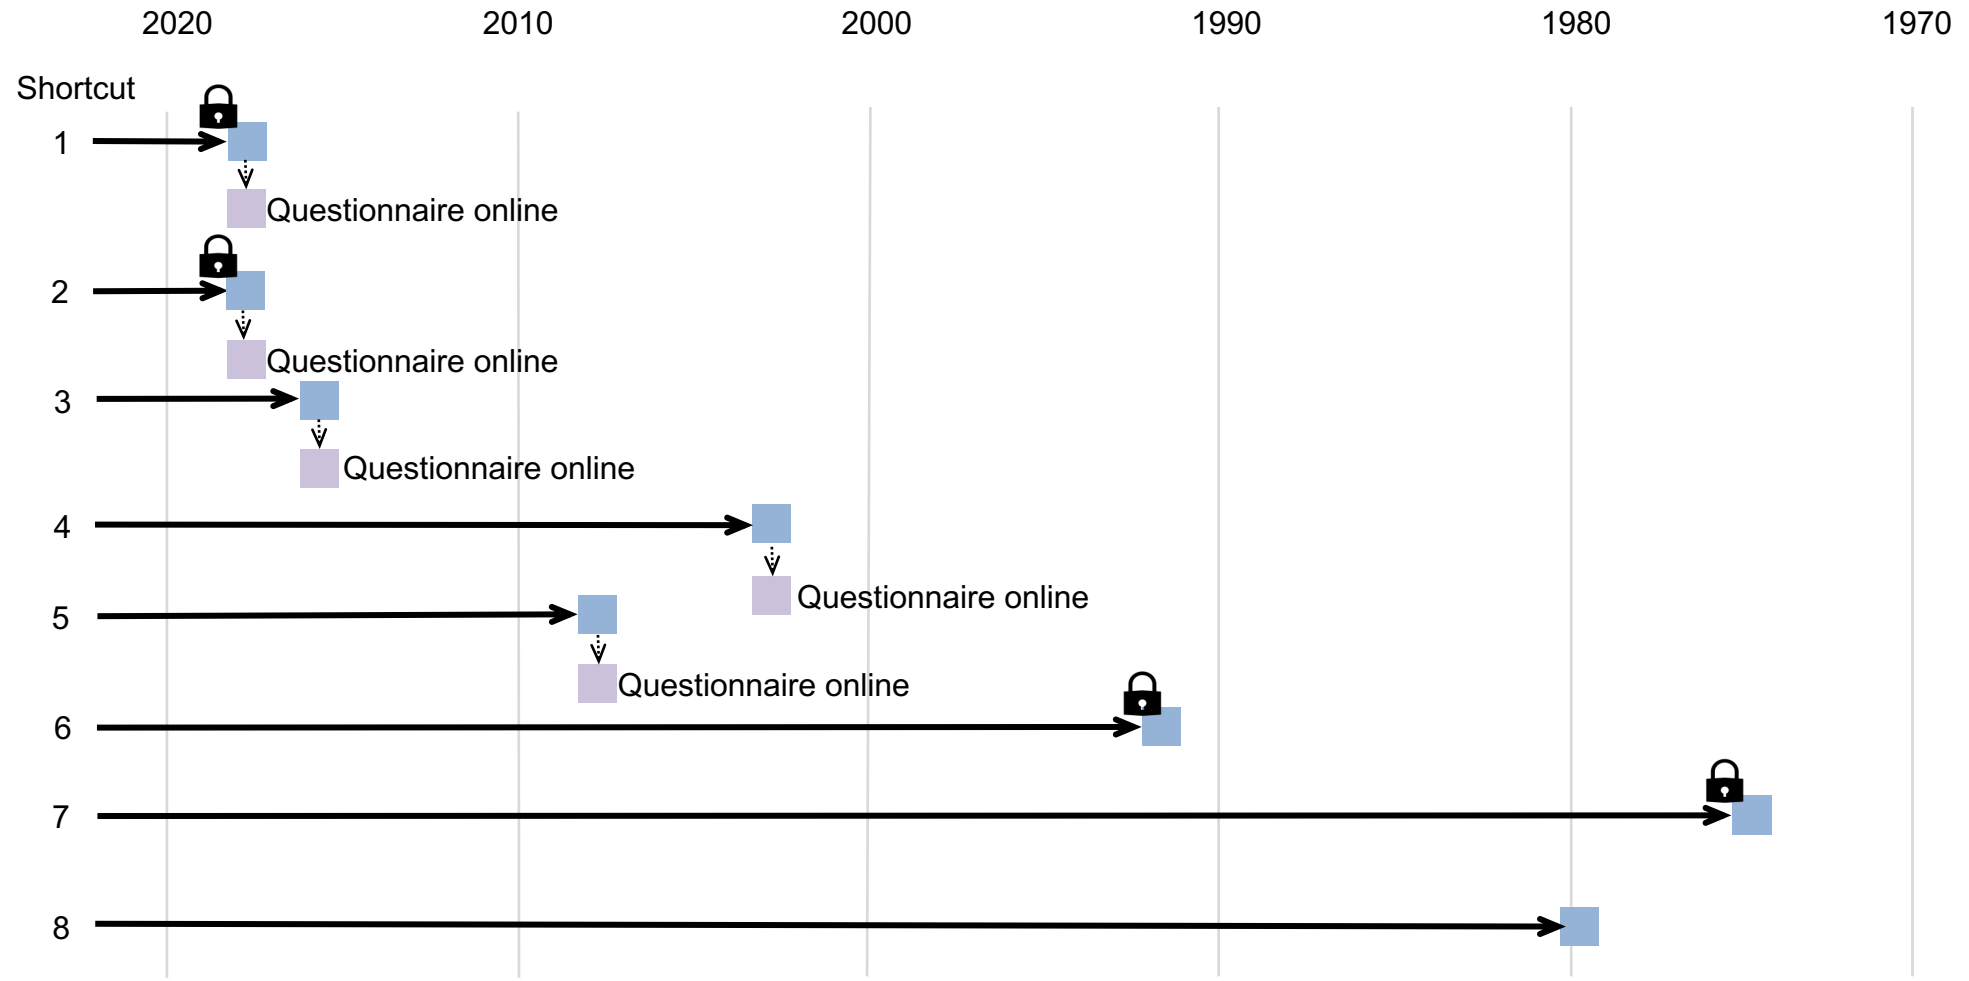

# Psychiatry 5th quintile

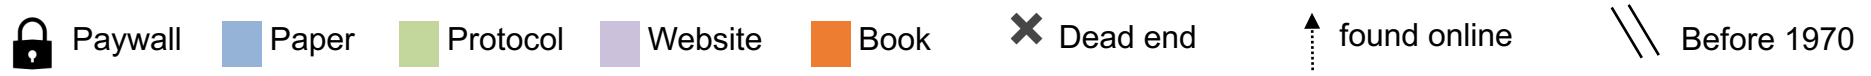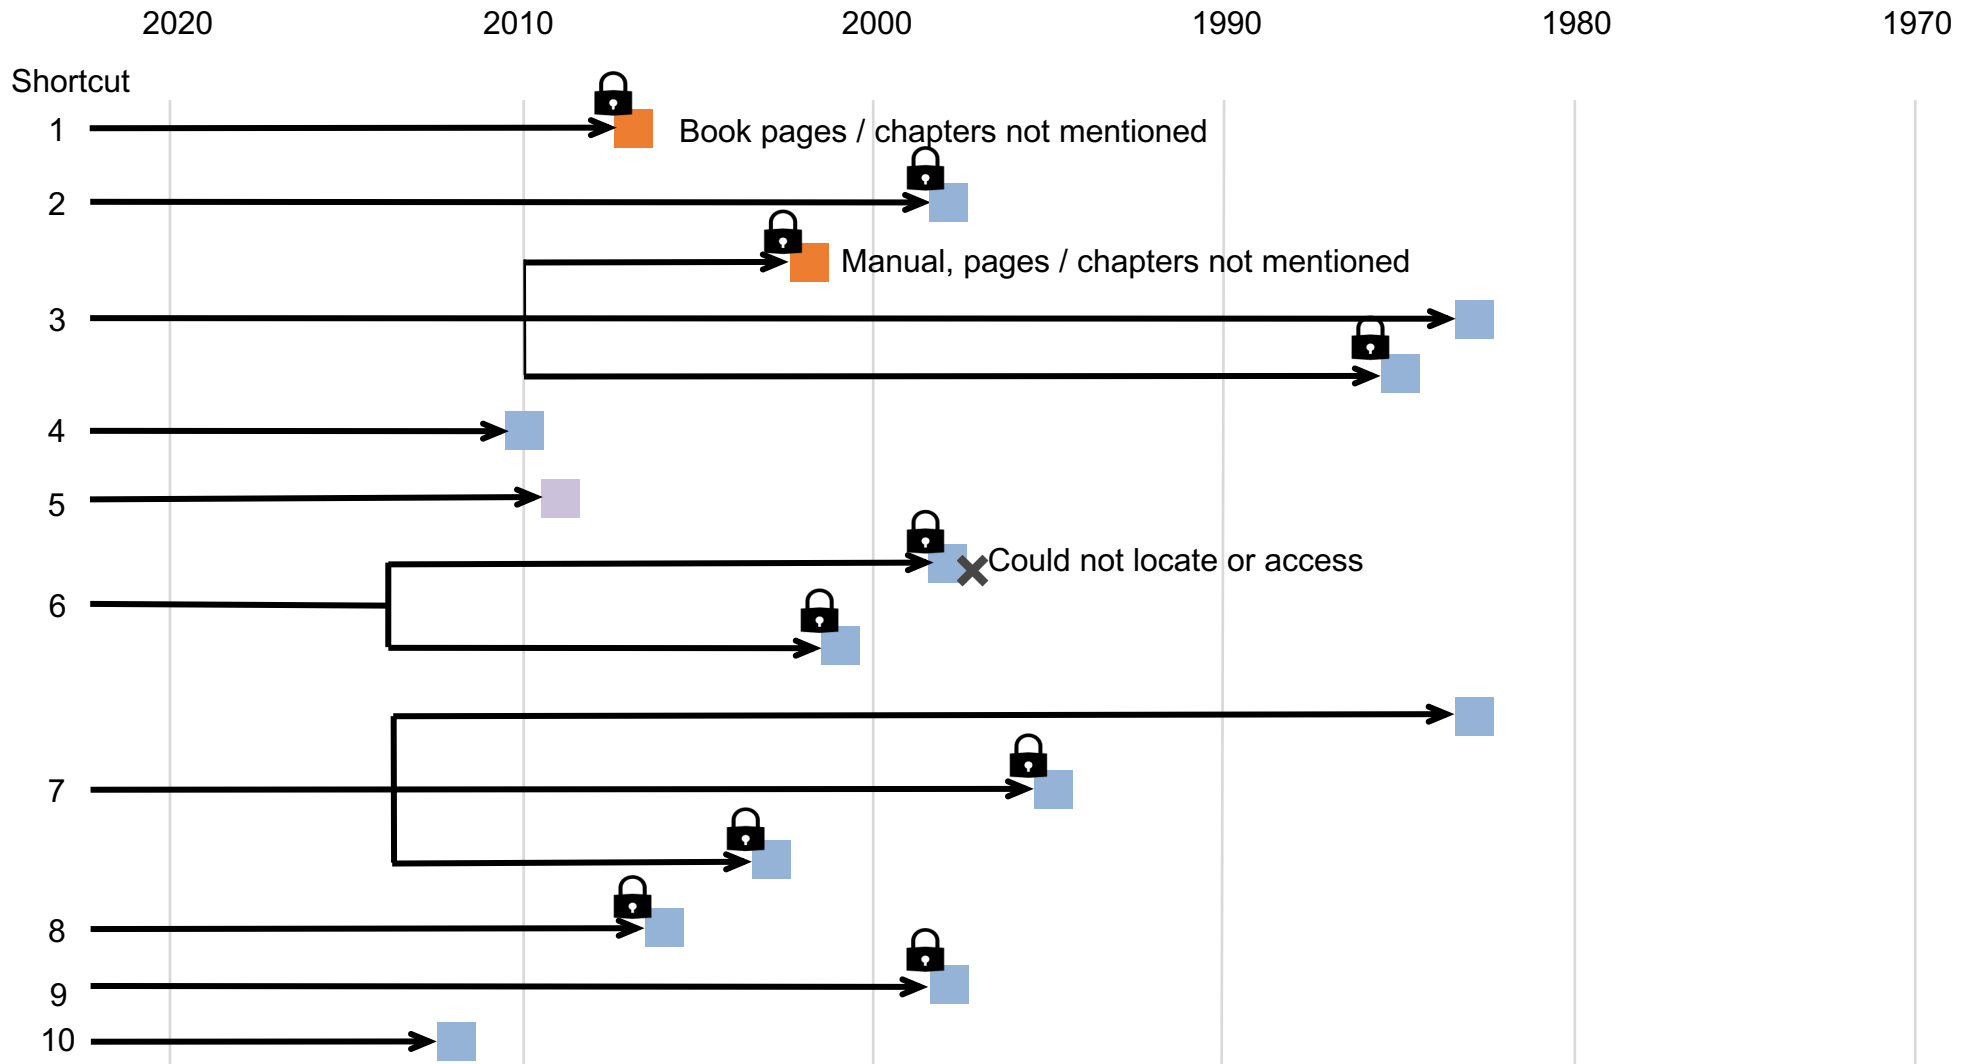

Supplement: pbio.3002562.s003.pdf [file pbio.3002562.s003.pdf]
